Toward Machine Learning-based Data-driven  
Functional Protein Studies: Understanding  
Colour Tuning Rules and Predicting the  
Absorption Wavelengths of Microbial Rhodopsins

Masayuki Karasuyama<sup>†</sup>

Nagoya Institute of Technology / JST PRESTO /

National Institute for Materials Science

`karasuyama@nitech.ac.jp`

Keiichi Inoue<sup>†</sup>

Nagoya Institute of Technology / OptoBioTechnology Research Center /

JST PRESTO

`inoue.keiichi@nitech.ac.jp`

Hideki Kandori\*

Nagoya Institute of Technology / OptoBioTechnology Research Center

`kandori@nitech.ac.jp`

Ichiro Takeuchi\*

Nagoya Institute of Technology / RIKEN /

National Institute for Materials Science

`takeuchi.ichiro@nitech.ac.jp`

November 29, 2017

---

<sup>†</sup>Equally contributed

\*Corresponding author

## Abstract

The light-dependent ion-transport function of microbial rhodopsin has been widely used in optogenetics for optical control of neural activity. In order to increase the variety of rhodopsin proteins having a wide range of absorption wavelengths, the light absorption properties of various wild-type rhodopsins and their artificially mutated variants were investigated in the literature. Here, we demonstrate that a machine-learning-based (ML-based) data-driven approach is useful for understanding and predicting the light-absorption properties of microbial rhodopsin proteins. We constructed a database of 796 proteins consisting of microbial rhodopsin wildtypes and their variants. We then proposed an ML method that produces a statistical model describing the relationship between amino-acid sequences and absorption wavelengths and demonstrated that the fitted statistical model is useful for understanding colour tuning rules and predicting absorption wavelengths. By applying the ML method to the database, two residues that were not considered in previous studies are newly identified to be important to colour shift.

## 1 Introduction

Microbial rhodopsin is a photoreceptive membrane protein of microbial species, such as eubacteria, archaea, fungi, and algae. The functions of microbial rhodopsin are very diverse. Light-driven ion (proton, chloride, sodium, and so on) pumps, light-gated cation and anion channels, photochromatic gene regulator and light-regulated enzymes have been reported for various species<sup>1</sup>. The light-dependent ion-transport function of microbial rhodopsin is widely used in optogenetics for optical control of neural activity in the brain network<sup>2</sup>. Most microbial rhodopsins bind a common chromophore, *all-trans* retinal, via a protonated Schiff-base linkage in the center of the hepta-transmembrane scaffold (Fig. 1). Each microbial rhodopsin exhibits a variety of specific visible absorption wavelengths of their retinal. While the protonated *all-trans* retinal Schiff-base shows

30 the absorption peak at  $\sim 450$  nm in organic solvents<sup>3</sup>, the wavelengths of ab-  
31 sorption maxima of retinal ( $\lambda_{\text{max}}$ s) in microbial rhodopsin range from 436 nm  
32 of channel-rhodopsin from *Tetraselmis striata* (TsChR)<sup>4</sup> to 587 nm of sensory  
33 rhodopsin I<sup>5</sup>. This wide-range colour tuning of the retinal in rhodopsin is con-  
34 sidered to be achieved by optimizing the steric and/or electrostatic interaction  
35 with surrounding amino-acid residues.

36 Increasing the variety of absorption wavelengths enables simultaneous optical  
37 control by different colours of light. Furthermore, the microbial rhodopsin hav-  
38 ing highly red-shifted absorption maximum is strongly demanded for optogenetic  
39 application, because of the lower phototoxicity and higher tissue-penetration  
40 length of longer-wavelength light<sup>4</sup>. As such, various rhodopsin genes have been  
41 screened in order to find additional colour-shifted proteins<sup>4,6</sup>. While many  
42 blue-absorbing rhodopsin at  $\lambda < 500$  nm have been reported<sup>7</sup> and even ap-  
43 plied to optogenetics<sup>4</sup>, the longer absorption maxima are limited in  $< 600$  nm.  
44 Thus, further artificial molecular modifications of protein were needed in order  
45 to achieve greater red-shifted absorption. Random and/or semi-empirical point  
46 mutations identify the types of amino-acid mutation that are effective for colour  
47 tuning<sup>8,9</sup>. Although numerous mutations causing bathochromic shift without  
48 disrupting protein function were identified in this way, the degree of shift is  
49 insufficient for application, and comprehensive screening is difficult because of  
50 the large number of possible mutations ( $> 20^{200}$ ). Although more rational  
51 molecular design is expected for quantum chemical calculation to estimate the  
52 absorption energy<sup>10</sup>, its high calculation cost makes application to wide-range  
53 screening difficult. An alternative technique for expanding the absorption range  
54 is the incorporation of natural or artificial retinal analogues<sup>11</sup>. For optogenetic  
55 application, however, a tissue-directed delivery method of these analogues must  
56 be developed.

57 In the present paper, we report the results of a data-driven approach for  
58 studying the light-absorption properties of microbial rhodopsin proteins by ma-  
59 chine learning (ML). We constructed a database of 796 proteins consisting of  
60 microbial rhodopsin wildtypes and their variants, some of which were previously

61 reported in the literature and others of which are newly reported herein (see  
62 Supplementary Table 1). Each entry of the database consists of the amino-acid  
63 sequence and absorption wavelength  $\lambda_{\max}$  of a rhodopsin. We introduce an ML  
64 method for constructing a statistical model describing the relationship between  
65 amino-acid sequences and absorption wavelengths. The goal of the present pa-  
66 per is to demonstrate the effectiveness of ML-based data-driven approaches for  
67 functional protein studies. By constructing a database based on past experi-  
68 mental results and applying an ML method to the database, a statistical model  
69 describing the relationship between amino-acid sequences and molecular prop-  
70 erties can be constructed. In the context of microbial rhodopsin studies, we  
71 illustrate the utility of such a statistical model by demonstrating that it can  
72 be effectively used for understanding the colour tuning rules and predicting the  
73 absorption wavelength (see Fig. 2).

74 We consider the following hypothetical scenario for the purpose of demon-  
75 stration. The database is divided into two sets: a target protein set and a  
76 training protein set. The target set contains KR2 wild-type rhodopsin and its  
77 variants (which, in the present study, are assumed to be uninvestigated as of  
78 yet), whereas the training set contains the remaining proteins in the database.  
79 We constructed an ML model using only the proteins in the training set. The  
80 constructed model was then applied to the proteins in the target set for pre-  
81 dicting the absorption wavelengths of KR2 and its variants. This scenario is  
82 interpreted as a hypothetical situation where a researcher is interested in pre-  
83 dicting the absorption wavelengths of a new group of rhodopsin proteins based  
84 on previously reported data on other groups of rhodopsin proteins.

85 Among the various available ML methods, we used a *group-wise sparse learn-*  
86 *ing* approach<sup>12,13,14</sup>. The advantages of group-wise sparse learning approaches  
87 are not only predictability but also interpretability of the constructed models.  
88 As we report later herein, by using a group-wise sparse learning approach, the  
89 absorption wavelengths of KR2 and its variants could be predicted from their  
90 amino-acid sequences with an average error of  $\pm 7.8$  nm. The residues affecting  
91 the absorption wavelength were also identified, and their strength for colour

92 shift and the effect of mutation were quantitatively investigated. Through this  
93 analysis, the positions of BR Glu161 and Ala126, the effects for colour shift  
94 of which were not reported in previous studies, were newly shown to signifi-  
95 cantly affect the absorption wavelengths. Furthermore, the model constructed  
96 by a group-wise sparsity learning approach enables the identification of *active*  
97 *residues*, i.e., residues for which the choice of the amino-acid species has a great  
98 influence on the absorption wavelength. Although we herein focus on the pre-  
99 diction of absorption wavelengths of rhodopsin proteins, the same ML approach  
100 can be used to predict other molecular properties in other types of functional  
101 proteins.

## 102 2 Results

103 **Microbial rhodopsin database** In order to demonstrate the effectiveness  
104 of ML-based data-driven approaches for microbial rhodopsin studies, we con-  
105 structed a database. The database is composed of amino-acid sequences and  
106 absorption wavelengths  $\lambda_{\max}$ s of 519 proteins previously reported in the liter-  
107 ature and 277 proteins investigated by our group without previous report (see  
108 Supplementary Table 1). As reported in a previous study<sup>15</sup>, for data-driven  
109 approaches such as the present study, it is important to construct a database  
110 containing not only reported experimental results but also unreported results.  
111 We applied alignment algorithm ClustalW to these amino-acid sequences and  
112 obtained aligned sequences of 475 residues, among which we extracted the trans-  
113 membrane region, resulting in 210 residues. For the purpose of demonstration,  
114 we divided the dataset into a *target protein set* and a *training protein set* (see  
115 Fig. 3).

116 The target set consists of 119 rhodopsin proteins in the KR2 group (KR2  
117 wildtype and its 118 variants), whereas the training set consists of the remain-  
118 ing 677 rhodopsin proteins (see Figs. 1 and 3). We applied an ML method to  
119 the training set and constructed a statistical model describing the relationship  
120 between the amino-acid sequences and absorption wavelengths. The statistical

121 model was then applied to the rhodopsin proteins in the target set in order  
122 to predict their absorption wavelengths. This scenario assumes a hypotheti-  
123 cal situation in which a researcher is interested in investigating a new group  
124 of rhodopsin proteins based on previously reported data on other groups of  
125 rhodopsin proteins.

126 **Machine learning method** In order to handle amino-acid sequences in the  
127 ML framework, we introduced a binary representation, as depicted in Fig. 4(a).  
128 Let  $M = 20$  be the number of different amino-acid species, and let  $N = 210$  be  
129 the number of residues considered herein. Then, an amino-acid sequence is rep-  
130 resented by  $M \times N = 4,200$  binary variables, which we denote as  $\mathbf{x} \in \{0, 1\}^{MN}$ .  
131 We consider a linear model for such  $MN$ -dimensional variables with an intercept  
132 parameter  $\beta_0$  and  $MN$  coefficient parameters  $\beta_{i,j}, i = 1, \dots, M, j = 1, \dots, N$   
133 (see Fig. 4(b)). These  $1 + MN$  parameters are fitted based on the training set  
134 so that the output of the model  $f(\mathbf{x})$  can predict the absorption wavelength of  
135 the rhodopsin protein for which the amino-acid sequence is coded as  $\mathbf{x}$ . Since  
136 this model has so many parameters, it is difficult to interpret the fitted model  
137 if we simply use conventional methods such as the least-squares method. We  
138 thus introduced the *group-wise sparsity mechanism* (See the Method section and  
139 the Supplemental information for details). Using this mechanism, the fitted co-  
140 efficient parameters  $\beta_{i,j}$  have *residue-wise sparsity*. Here,  $M = 20$  coefficient  
141 parameters corresponding to the choice of an amino-acid species in each residue  
142 is considered as a group. After we fitted the model, in many groups, all of the  
143  $M$  coefficient parameters become zero, indicating that the choice of an amino-  
144 acid species in these residues does not affect the colour tuning property. On the  
145 other hand, a small number of residues at which the coefficient parameters are  
146 NOT zero are called *active residues*, i.e., the choice of the amino-acid species  
147 in these residues is expected to play an important role in colour tuning. Figure  
148 4(c) illustrates the fitted coefficient parameters using the group-wise-sparsity  
149 mechanism. If a parameter  $\beta_{i,j}$  is positive/negative, then the  $i$ -th amino-acid  
150 species in the  $j$ -th residue has a red-shifting/blue-shifting effect on the light

151 absorption properties of rhodopsin proteins.

152 **Understanding colour tuning rules** By applying the above ML method  
153 to the training set containing pairs of the amino-acid sequence and absorption  
154 wavelength for 677 rhodopsin proteins, we fitted a linear model with  $1 + MN =$   
155  $4,201$  parameters. A complete list of the fitted parameters is presented in Sup-  
156 plementary Table 2. Figure 5 shows the fitted coefficient parameters at 20 active  
157 residues in decreasing order of  $s_j := \sqrt{\sum_{i=1}^M \beta_{i,j}^2}$ ,  $j = 1, \dots, N$ , where the score  
158  $s_j$  quantifies the *activeness* of the  $j$ -th residue. Here, red and blue indicate that  
159 the corresponding parameters are positive and negative, respectively, whereas  
160 grey indicates that the parameters were zero. In other words, red and blue sug-  
161 gest that having the amino-acid species in the residue would have a red-shifting  
162 and a blue-shifting effect, respectively. The results in Supplementary Table 2  
163 and Fig. 5 can be interpreted as a comprehensive statistical description of the  
164 colour tuning rules of rhodopsin proteins based on previously investigated ex-  
165 perimental results for 677 rhodopsin proteins (Supplementary Figure 1 shows  
166 the same results obtained using all 796 rhodopsin proteins, including those in  
167 the KR2 group).

168 **Predicting absorption wavelengths of KR2 rhodopsin and its variants**

169 Using the statistical model fitted based on the training set (containing all of the  
170 rhodopsin proteins except for the KR2 group), the absorption wavelengths of  
171 the 136 rhodopsin proteins in the target set (containing KR2 group rhodopsin  
172 proteins) were predicted. Figures 6(a) and 6(b) show examples of predicted  
173 (green lines) and observed (blue lines) wavelengths for red-shifted KR2 mu-  
174 tants. For the KR2 NTQ/F72G mutant (Fig. 6(a)), the difference between  
175 the predicted (546.44 nm) and experimentally observed (543 nm) wavelengths  
176 is only 3.44 nm. In contrast, we observed a larger discrepancy (8.51 nm) for  
177 the predicted (556.49 nm) and experimentally observed (565 nm) wavelengths  
178 for KR2 D116N. This means that the precision of ML prediction differs for each  
179 type of mutation. Examples of blue-shifted mutants are shown in Figs. 6(c)

180 (KR2 N112E) and 6(d) (KR2 DTD/D102N). The differences between the pre-  
181 diction and the observation were 7.34 and 19.92 nm for the former and latter,  
182 respectively. Figure 6(e) summarizes the prediction results for KR2 and all of  
183 its mutants, where the horizontal axis represents the *observed* absorption wave-  
184 lengths measured in the experiments, whereas the vertical axis represents the  
185 *predicted* absorption wavelengths obtained by the ML model. The red points  
186 indicate the KR2 group rhodopsin proteins in the target set, whereas the black  
187 points indicate other rhodopsin proteins in the training set. Note that the pre-  
188 diction performance in the training set (black points) is slightly better than that  
189 in the target set (red points). This is because the former is used for fitting the  
190 ML model itself, whereas the latter is completely new to the fitted model. This  
191 phenomenon is known as *over-fitting* in the literature of machine learning. The  
192 absorption wavelengths of KR2 and its variants could be predicted from their  
193 amino-acid sequences with average errors of  $\pm 7.8$  nm. The histogram in Fig.  
194 6(b) shows the distribution of the prediction errors in the KR2 group rhodopsin  
195 proteins in the target set.

196 **Estimating the effect of point mutations** The effect of a point mutation  
197 on the absorption wavelength shift can be estimated based on the coefficient  
198 parameters  $\beta_{i,j}$ ,  $i = 1, \dots, M, j = 1, \dots, N$ . Let  $\mathbf{x}^{(\text{KR2})} \in \{0, 1\}^{MN}$  be the  
199 binary vector representation of the KR2 wild-type sequence. The difference  
200 in the predicted absorption wavelengths between KR2 wildtype and a variant  
201 having amino-acid sequence  $\mathbf{x}^{(\text{Var})} \in \{0, 1\}^{MN}$  is written as

$$f(\mathbf{x}^{(\text{Var})}) - f(\mathbf{x}^{(\text{KR2})}) = \sum_{i=1}^M \sum_{j=1}^N \beta_{i,j} x_{i,j}^{(\text{Var})} - \sum_{i=1}^M \sum_{j=1}^N \beta_{i,j} x_{i,j}^{(\text{KR2})}.$$

202 The colour-shifting effect of point mutation at the  $j$ -th residue is written as

$$\sum_{i=1}^M \beta_{i,j} \left( x_{i,j}^{(\text{Var})} - x_{i,j}^{(\text{KR2})} \right). \quad (1)$$

203 For example, if the  $i_1$ -th amino-acid species in the KR2 wildtype is replaced  
204 by the  $i_2$ -th amino-acid species, the colour-shifting effect of the point mutation



205 is  $\beta_{i_2,j} - \beta_{i_1,j}$ . Figure 7 shows a portion of the amino-acid sequences of KR2  
206 wildtype and its variants along with their observed and predicted absorption  
207 wavelengths. In Fig. 7, red and blue indicate red-shifting and blue-shifting ef-  
208 fects, respectively, in Eq. (1) estimated by the trained statistical model. Figure  
209 7(a) suggests that point mutation at BR residue number 89 would have red-  
210 shifting effects. On the other hand, Fig. 7(b) suggests that point mutation at  
211 BR residues 85 and 122 would have blue-shifting effects. These results indicate  
212 that the estimated colour-shifting effects are consistent with the actual observed  
213 wavelength shifts caused by the mutation.

### 214 **3 Discussion**

215 **Colour tuning rules in the estimated statistical models by ML** Ten  
216 residues showing the highest  $\beta$ -values were overlaid on the X-ray crystallo-  
217 graphic structure of BR (PDB code: 1BM1) (see Fig. 8). Eight of these  
218 residues are located around retinal within  $< 5 \text{ \AA}$  (BR Thr89, Ala215, Gly122,  
219 Leu93, Asp85, Asp212, Met118, and Trp86 in the order of degree of activeness).  
220 Thr89 showed the highest degree of activeness. This is a member of the DTD-  
221 motif, which represents the type of functional determining three residues in the  
222 third transmembrane helix (helix-C) for each ion-pump rhodopsin. The DTD-  
223 motif is typical for the outward  $\text{H}^+$  pump and is composed of Asp85, Thr89,  
224 and Asp96 for BR<sup>16</sup>. While this threonine is conserved among most microbial  
225 rhodopsins, it is replaced with an aspartate for sodium pump rhodopsin (NaR),  
226 which has the NDQ-motif rather than the DTD-motif<sup>17,16,18</sup>. The position of  
227 BR Thr89 is close to RSB (the distance between BR Thr89C $\gamma$  and the nitrogen  
228 atom of RSB is 3.4  $\text{\AA}$ ). The third and seventh active residues are BR Gly122  
229 and Met118, respectively. These residues are highly conserved among various  
230 microbial rhodopsins. Their mutation causes the rotation of the C6-C7 bond of  
231 retinal and the shortening of the  $\pi$ -electron conjugation between the  $\beta$ -ionone  
232 ring and the polyene chain<sup>19,20</sup>. The largest coefficient parameters are obtained  
233 for glycine and methionine for the former and latter positions. This implies

234 any type of mutation of these residues results in the blue-shift of  $\lambda_{\max}$  and is  
235 consistent with previous experimental reports<sup>18,19</sup>.

236 The residues of BR Ala215 and Leu93 exhibit the second and fourth highest  
237 degrees of activeness. Both BR Ala215 and Leu93 are well known to have a  
238 role in colour-tuning switching for various rhodopsins in nature. Shimono et  
239 al. reported that, whereas green-to-orange absorbing archeal rhodopsins (BR,  
240 halorhodopsin and sensory rhodopsin I) conserve an alanine at the position  
241 of BR Ala215, blue-absorbing rhodopsins, such as *pharaonis* phoborhodopsin  
242 (*ppR*, which is also referred to as *pharaonis* sensory rhodopsin II) has a serine  
243 or threonine at this position<sup>21</sup>. The difference of coefficient parameter values is  
244 approximately 11.8, which is close to the reported  $\lambda_{\max}$  shift of *ppR* T204A (8-  
245 nm red-shift)<sup>21</sup> and the BR homolog of *Haloquadratum walsbyi* (*HwBR*) A223T  
246 (13-nm blue-shift)<sup>22</sup>. BR Leu93 corresponds to Leu120 of green-absorbing pro-  
247 teorhodopsin (GPR). This residue is replaced with a glutamine in blue-absorbing  
248 proteorhodopsin (BPR), and this type of colour regulation is known as “L/Q-  
249 switching”<sup>23</sup>. The lowest coefficient parameter (-11.2) was obtained for a glu-  
250 tamine. This suggests that glutamine is most effective to achieve blue-shift  
251 absorption and is considered to be optimized in natural evolution in the deep-  
252 ocean environment<sup>23</sup>. Ozaki et al. reported that mutations to valine or bulky  
253 residues (lysine, phenylalanine, tyrosine, and tryptophan) cause a large red-  
254 shift<sup>24</sup> of  $\lambda_{\max}$ . Their larger coefficient parameters are consistent with previous  
255 experimental results (Fig. 5).

256 BR Asp85 and Asp212 are generally deprotonated and work as counterions  
257 to protonated RSB. The electrostatic interaction between their negative charges  
258 and the  $\pi$ -electron of retinal destabilizes the energy level of the electronically  
259 excited state. This results in the blue-shift of  $\lambda_{\max}$ <sup>25</sup>. Whereas the aspartate at  
260 the position of BR Asp85 has the second lowest coefficient value (-19.5) among  
261 all of the residues investigated herein, the value of the position of BR Asp212 is  
262 moderate (-3.2). This result suggests that the former has a much stronger effect  
263 on colour tuning, despite the symmetric location of these two residues relative  
264 to RSB. (The distances from Asp85 and Asp212 to the N atom of RSB are 3.4

265 and 3.5 Å, respectively.)

266 The eighth largest coefficient parameter was the position of BR Trp86.  
267 This tryptophan is one of the most highly conserved residues among micro-  
268 bial rhodopsins. It forms a part of the binding pocket by direct contact with  
269 the extracellular side of the polyene chain of retinal1. This strong interaction  
270 with retinal is consistent with the high degree of activeness of this residue and  
271 the coefficient parameter of tryptophan is a large positive value (12.0). This  
272 suggests that this tryptophan has a role in shifting the absorption wavelength  
273 to be longer in many rhodopsins.

274 The positions of BR Glu161 and Ala126 are relatively far from retinal (having  
275 the 9-th and 10-th largest coefficient parameters). To our knowledge, there  
276 are no previous studies focused on the colour-tuning effects of these residues.  
277 For the position of BR Glu161, larger red- and blue shifts are expected for  
278 valine and tyrosine. In fact, sensory rhodopsin I (SRI), which is a positive  
279 phototactic sensor, has a valine at this position and exhibits relatively longer  
280 absorption maxima (e.g., the SRI of *Halobacterium salinarum* (*HsSRI*): 587  
281 nm; SRI of *Haloarcula vallismortis* (*HvSRI*): 545 nm). In contrast, a tyrosine  
282 is conserved among various channelrhodopsins (ChRs), which generally have  
283 short absorption wavelengths (e.g., the ChR1 of *Chlamydomonas reinhardtii*  
284 (*CrChR1*): 453 nm; ChR1 of *Dunaliella salina* (*DChR1*): 475 nm; ChR2 of  
285 *Proteomonas sulcata* (*PsChR2*): 444 nm). The results of ML analysis suggest  
286 the position of BR Glu161 is important for the colour tuning of these rhodopsins  
287 in nature. The position of BR Ala126 exhibited a large coefficient value for  
288 glutamic acid (10.5). Actually, *Gloeobacter* rhodopsin (GR), the outward H<sup>+</sup>  
289 pump rhodopsin of cyanobacterium, *Gloeobacter violaceus* PCC 7421, has a  
290 glutamic acid at this position (GR Glu166), and the mutation of this residue  
291 exhibited a blue-shift of 1 to 22 nm (Supplementary Table 1). Thus, GR Glu166  
292 works as an active residue for the colour tuning in GR.

293 These results imply the usefulness of ML analysis in identifying active residues  
294 located far from retinal, which are generally of less concern in experimental re-  
295 search on the colour tuning mechanism from a structural point of view. The

296 effects on the absorption wavelength by the mutation of these residues have not  
297 yet been reported. However, we expect that they will be experimentally verified  
298 in the near future.

299 **Toward Experimental Design** The fitted linear model parameters  $\beta_{i,j}$ ,  
300  $i = 1, \dots, M, j = 1, \dots, N$  can be also used as a guide for new functional  
301 protein design. For example, suppose that a researcher wants to construct a  
302 rhodopsin mutant, the absorption wavelength of which is as long as possible for  
303 opt-genetics application. Note that positive/negative coefficient parameter val-  
304 ues indicate that the amino-acid species at the residue have a red-shifting/blue-  
305 shifting effect, respectively, on the light-absorption properties of rhodopsin pro-  
306 teins. Consider a residue  $j$  at which there exists  $i_1$  and  $i_2$  such that  $\beta_{i_1,j} < \beta_{i_2,j}$ .  
307 If there exists a rhodopsin protein having the  $i_1$ -th amino-acid species at the  
308  $j$ -th residue, by replacing this species with the  $i_2$ -th amino-acid species, the new  
309 protein is expected to have a longer wavelength than the original protein. This  
310 means that, the basic experimental design strategy for the above-mentioned re-  
311 searcher would be to replace the amino-acid species having a smaller coefficient  
312 parameter with that having a larger coefficient parameter. Although many other  
313 factors, such as protein stability and functionality, must be taken into account in  
314 new functional protein design, the above discussion suggests that the ML-based  
315 data-driven approach enables systematic design of experiments without relying  
316 on the intuition or heuristics of researchers.

## 317 4 Methods

318 **Construction of a dataset of amino-acid sequences and  $\lambda_{\max}$ S** For ML  
319 analysis, we constructed a database (Supplementary Table 1) composed of the  
320 amino-acid sequences and the previously and newly reported  $\lambda_{\max}$ S of microbial  
321 rhodopsins and their variants. Previously reported  $\lambda_{\max}$ S were collected from  
322 102 reports (listed in Supplementary Information 2). Newly reported  $\lambda_{\max}$ S  
323 were experimentally determined in our group by the hydroxylamine bleaching

324 method for *E. coli* membrane expressing rhodopsins<sup>26</sup> or purified protein by  
325 Ni- or Co-NTA chromatography<sup>17</sup>, as described previously. The method used  
326 to determine each rhodopsin is also listed in Supplementary Table 1.

### 327 **Details of the ML method with group-wise sparsity regularization**

328 Our data contains a larger number of variables (4,200 binary variables) than  
329 the number of instances (677 rhodopsin proteins). In this case, classical least-  
330 squares methods may cause over-fitting of the training data, which results in  
331 poor prediction accuracy for the target data. *Sparse modeling*<sup>12,13</sup> is a stan-  
332 dard approach to this problem setup so that only a small subset of coefficient  
333 parameters is automatically selected. In particular, we use a group-wise sparsity  
334 method<sup>14</sup> to analyze the residue-wise effect on the absorption wavelength. Let  
335  $x_{i,j} \in \{0, 1\}$  be a binary variable that indicates the existence of the  $i$ -th amino-  
336 acid species in the  $j$ -th residue, where  $i = 1, \dots, M$  and  $j = 1, \dots, N$ . Here,  
337 each  $i = 1, \dots, M$  of  $x_{i,j}$  corresponds to one of  $M = 20$  amino-acid species.

338 We consider predicting the absorption wavelength based on a linear model:

$$f(\mathbf{x}) = \beta_0 + \sum_{i=1}^M \sum_{j=1}^N \beta_{i,j} x_{i,j},$$

339 where  $\beta_0$  and  $\beta_{i,j}$  for  $i = 1, \dots, M$  and  $j = 1, \dots, N$  are parameters. Suppose  
340 that we have  $K$  pairs of an amino-acid sequence and its absorption wavelength  
341  $\{(\mathbf{x}^{(k)}, \lambda_{\max}^{(k)})\}_{k=1}^K$ , where  $\mathbf{x}^{(k)} \in \mathbb{R}^{MN}$  is the binary representation of the amino-  
342 acid sequence aligned as a vector, and  $\lambda_{\max}^{(k)} \in \mathbb{R}$  is the absorption wavelength of  
343 the  $k$ -th rhodopsin protein. The parameters are fitted by solving the following  
344 penalized least-squares problem:

$$\min_{\beta_0, \beta} \sum_{k=1}^K \left( \lambda_{\max}^{(k)} - \beta_0 - \sum_{i=1}^M \sum_{j=1}^N \beta_{i,j} x_{i,j}^{(k)} \right)^2 + \gamma \sum_{j=1}^N \sqrt{\sum_{i=1}^M \beta_{i,j}^2},$$

345 where  $\gamma > 0$  is a tuning parameter. This formulation is called *group LASSO*<sup>14</sup>,  
346 in which the first term is the sum of the squared prediction errors, and the  
347 second term is the group-wise penalty for the parameters. For each residue  
348  $j = 1, \dots, N$ , we define the  $M = 20$  coefficient parameters  $(\beta_{1,j}, \dots, \beta_{M,j})$  as a

349 group. If the training set indicates that the choice of the amino-acid species at  
350 the  $j$ -th residue does not affect the colour tuning property, then the group-wise  
351 sparsity penalty forces all of the  $M = 20$  parameters  $(\beta_{1,j}, \dots, \beta_{M,j})$  to be ex-  
352 actly zero. We can easily identify a set of important residues for determining the  
353 absorption wavelength by this effect, called *group-wise sparsity*, because usually  
354 only a small subset of the residues have non-zero coefficient parameters. In  
355 our experiment, the parameter  $\gamma$  was objectively chosen by the cross-validation  
356 procedure within the training set.

357 **Code availability** Our program code of the group LASSO for wavelength  
358 prediction is available at <http://...><sup>1</sup>

359 **Data availability** The database of the amino-acid sequences and their wave-  
360 lengths is provided in Supplementary Table 1.

---

<sup>1</sup>The site will be public after acceptance. The code is attached to our submission.

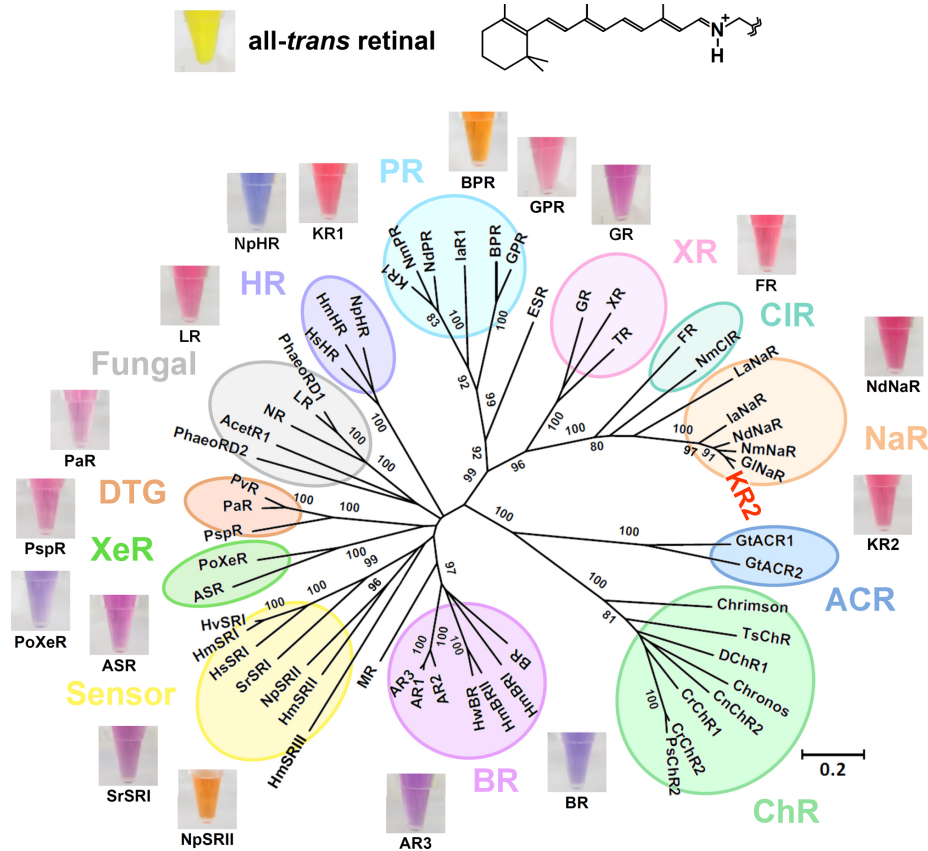

Figure 1: **The chemical structure of all-*trans* retinal (upper) and phylogenetic tree of microbial rhodopsins (lower).** The bootstrap values > 80% are shown for the corresponding branches. The photographs of the DMSO solution of all-*trans* retinal and detergent solubilized rhodopsins were aligned to show representative colours. The abbreviations of rhodopsin proteins are listed in Supplementary Information 1. In the present paper, we construct a machine-learning-based (ML-based) statistical model that describes the relationship between amino-acid sequences and absorption wavelengths of microbial rhodopsins based on past experimental data.

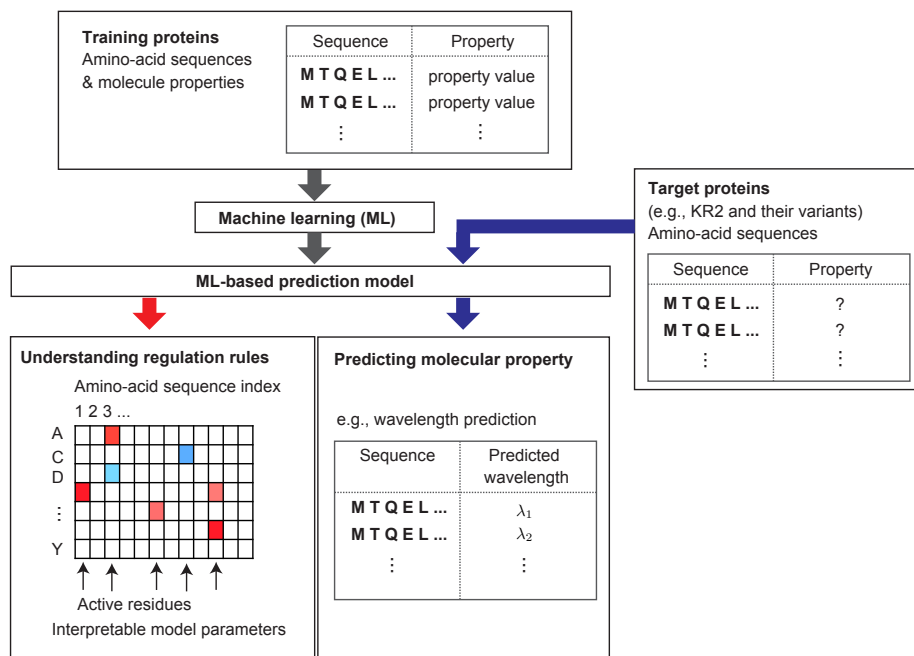

Figure 2: **An overview of the machine-learning-based (ML-based) data-driven approach introduced in the present paper for functional protein studies.** Using past experimental data, a *training protein set* containing pairs of amino-acid sequence and molecular properties is first constructed. Then, an ML method is applied to the training set, and an ML-based statistical model is constructed. The obtained ML model can be used in understanding the relationship between amino-acid sequences and molecular properties, such as the colour tuning rules in the case of microbial rhodopsins. The ML model can also be used to predict the molecular properties of new uninvestigated proteins. We refer to the set of new proteins as the *target protein set*. In the present paper, for the purpose of demonstration, we regard KR2 wildtype and its 118 variants as target proteins and other 677 rhodopsin proteins in the database as the training proteins.







Figure 4: **A schematic description of the ML method introduced in the present paper for functional protein studies.** (a) Binary sequence representation of an amino-acid sequence. Let  $M = 20$  be the number of amino-acid species, and let  $N$  be the number of residues considered in the present study. Then, the amino-acid sequence of a protein is represented by  $M \times N$  binary variables, each of which represents the amino-acid species at each residue. (b) By writing the  $MN$  binary variables as  $x_{i,j}, i = 1, \dots, M, j = 1, \dots, N$ , we consider an  $MN$ -dimensional linear model. The linear model has an intercept parameter  $\beta_0$  and  $MN$  coefficient parameters  $\beta_{i,j}, i = 1, \dots, M, j = 1, \dots, N$ . (c) When the linear model is fitted, a group-wise sparsity constraint is introduced. Then, in many residues, all of the corresponding  $M$  coefficients would be fitted to zero, and only a small number of residues have nonzero coefficient parameters. The latter residues are called *active residues*. The choice of amino-acid species in these active residues is expected to play an important role in determining molecular properties such as absorption wavelength.

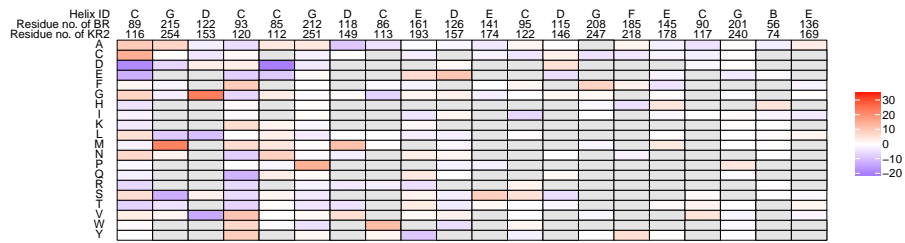

Figure 5: **Coefficient parameters of the fitted statistical model.** Coefficients for the top 20 active residues, where the activeness of each residue is defined as  $s_j := \sqrt{\sum_{i=1}^M \beta_{i,j}^2}$ ,  $j = 1, \dots, N$ . Here, red and blue indicate that the corresponding parameters are positive and negative, respectively, whereas grey indicates that the amino-acid species did not exist in the training data. The figure can be interpreted such that, if the value of a coefficient parameter  $\beta_{i,j}$  is positive/negative (i.e., red/blue), then the existence of the  $i$ -th amino-acid species at the  $j$ -th residue has a red-shifting/blue-shifting effect.

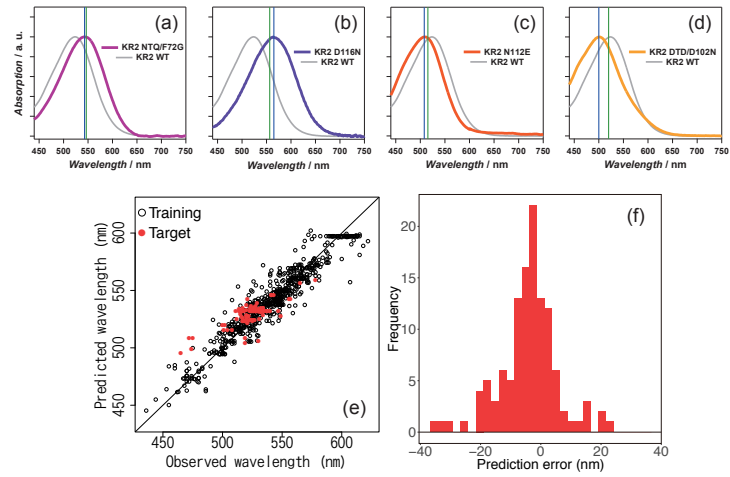

Figure 6: (See next page for the caption)

**Figure 6: Absorption wavelength prediction results for KR2 wildtype and its 118 variants.** (a)-(d) Absorption spectra of KR2 mutants ((a) KR2 NTQ/F72G, (b) D116N, (c) N112E, and (d) DTD/D102N) with their absorption maxima as predicted by ML analysis (green lines) and experimentally determined (blue lines). The spectrum of KR2 wildtype is indicated by the solid grey line. (e) The horizontal axis represents the experimentally observed absorption wavelengths, whereas the vertical axis represents the absorption wavelengths predicted by the ML model. The red points indicate the KR2 group rhodopsin proteins in the target set, whereas the black points indicate other rhodopsin proteins in the training set. (f) Histogram of the prediction errors for KR2 group proteins in the target set.

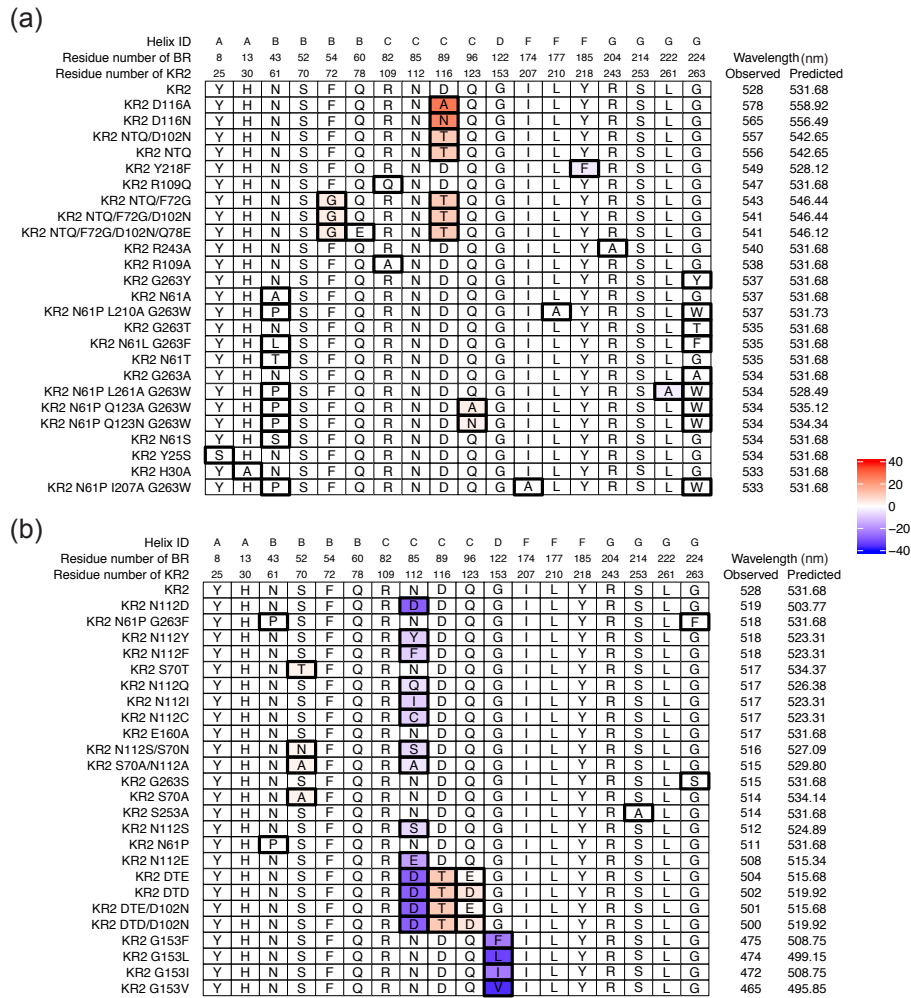

Figure 7: Lists of sequences for the KR2 wildtype and the variants with their observed and predicted absorption wavelengths. (a) KR2 and the 25 variants that have the longest observed wavelengths, and (b) KR2 and the 25 variants that have the shortest observed wavelengths. The residues shown here are replaced at least once among the 50 variants. Boxes with thick black lines indicate positions that have different amino-acid species from the KR2 wildtype. For these boxes, the colour indicates the wavelength change produced by the replacement of the  $j$ -th position, estimated by  $\sum_{i=1}^M \beta_{i,j} (x_{i,j}^{(\text{Var})} - x_{i,j}^{(\text{KR2})})$ , where  $x_{i,j}^{(\text{KR2})}$  and  $x_{i,j}^{(\text{Var})}$  are the binary representation the KR2 wildtype and a variant, respectively.

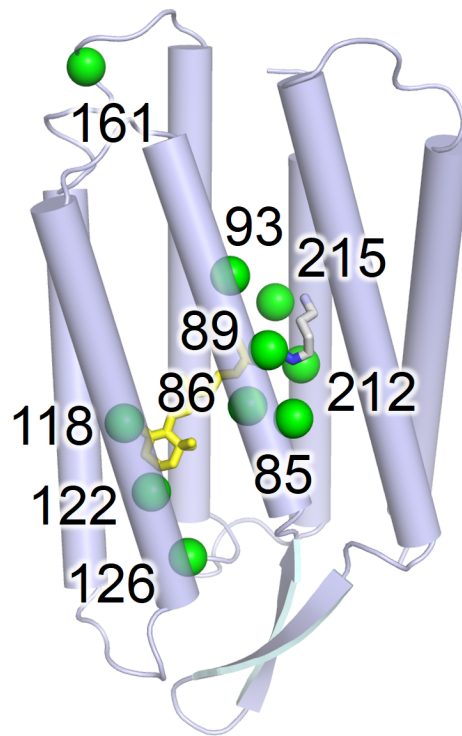

Figure 8: **Top 10 active residues identified by the fitted statistical model.** The positions of the active residues showing larger coefficient parameter values (green spheres) are mapped on the X-ray crystallographic structure of BR (blue, PDB code: 1BM1<sup>27</sup>) with their numbers in the case of BR.



361 **Acknowledgements**

362 We appreciate for the insightful discussion and data collection by Drs. R. Abe-  
363 Yoshizumi, M. Konno, Y. Kato, S. Ito, and Y. Inatsu. The present study  
364 was financially supported by grants from the Japanese Ministry of Education,  
365 Culture, Sports, Science and Technology to M.K. (16H06538 and 17H04694),  
366 K.I. (26708001, 26620005, and 17H03007), H.K. (25104009 and 15H02391), and  
367 I.T. (16H06538 and 17H00758), from JST PRESTO to M.K. (Grant Number  
368 JPMJPR15N2) and K.I. (Grant Numbers JPMJPR12A2 and JPMJPR15P2),  
369 from JST CREST to I.T. (Grant Numbers JPMJCR1302 and JPMJCR1502),  
370 from the RIKEN Center for Advanced Intelligence Project to I.T., and by the  
371 JST support program for starting up innovation-hub on materials research by  
372 information integration initiative to M.K. and I.T.

373 **Author contributions**

374 M.K. analyzed the data by machine learning. K.I. constructed the database and  
375 interpreted the results. H.K. and I.T. designed the entire research study.

## 376 References

- 377 [1] Ernst, O. P. *et al.* Microbial and animal rhodopsins: structures, functions,  
378 and molecular mechanisms. *Chem. Rev.* **114**, 126–163 (2014).
- 379 [2] Deisseroth, K. Optogenetics: 10 years of microbial opsins in neuroscience.  
380 *Nat. Neurosci.* **18**, 1213–1225 (2015).
- 381 [3] Blatz, P. E., Mohler, J. H., & Navangul, H. V. Anion-induced wavelength  
382 regulation of absorption maxima of schiff bases of retinal. *Biochemistry* **11**,  
383 848–855 (1972).
- 384 [4] Klapoetke, N. C. *et al.* Independent optical excitation of distinct neural  
385 populations. *Nat. Methods* **11**, 338–346 (2014).
- 386 [5] Bogomolni, R. & Spudich, J. The photochemical reactions of bacterial  
387 sensory rhodopsin-i. flash photolysis study in the one microsecond to eight  
388 second time window. *Biophysical Journal* **52**, 1071–1075 (1987).
- 389 [6] Lin, J. Y., Knutsen, P. M., Muller, A., Kleinfeld, D., & Tsien, R. Y.  
390 ReaChR: a red-shifted variant of channelrhodopsin enables deep transcranial  
391 optogenetic excitation. *Nat. Neurosci.* **16**, 1499–1508 (2013).
- 392 [7] B ej a, O., Spudich, E. N., Spudich, J. L., Leclerc, M., & DeLong, E. F.  
393 Proteorhodopsin phototrophy in the ocean. *Nature* **411**, 786–789 (2001).
- 394 [8] Kim, S. Y., Waschuk, S. A., Brown, L. S., & Jung, K.-H. Screening and  
395 characterization of proteorhodopsin color-tuning mutations in *Escherichia*  
396 *coli* with endogenous retinal synthesis. *Biochim. Biophys. Acta* **1777**, 504  
397 – 513 (2008).
- 398 [9] Engqvist, M. K. *et al.* Directed evolution of *Gloeobacter violaceus* rhodopsin  
399 spectral properties. *J. Mol. Biol.* **427**, 205–220 (2015).
- 400 [10] Melaccio, F. *et al.* Toward automatic rhodopsin modeling as a tool for  
401 high-throughput computational photobiology. *J. Chem. Theory Comput.*  
402 **12**, 6020–6034 (2016).

- 403 [11] Ganapathy, S. *et al.* Retinal-based proton pumping in the near infrared.  
404 *J. Am. Chem. Soc.* **139**, 2338–2344 (2017).
- 405 [12] Hastie, T., Tibshirani, R., & Wainwright, M. *Statistical Learning with*  
406 *Sparsity: The Lasso and Generalizations*. CBC Press, (2015).
- 407 [13] Tibshirani, R. Regression shrinkage and selection via the lasso. *J. Royal.*  
408 *Statist. Soc. B* **58**, 267–288 (1996).
- 409 [14] Yuan, M. & Lin, Y. Model selection and estimation in regression with  
410 grouped variables. *Journal of the Royal Statistical Society: Series B (Sta-*  
411 *tistical Methodology)* **68**, 49–67 (2006).
- 412 [15] Raccuglia, P. *et al.* Machine-learning-assisted materials discovery using  
413 failed experiments. *Nature* **533**, 73–76 (2016).
- 414 [16] Béjà, O. & Lanyi, J. K. Nature’s toolkit for microbial rhodopsin ion pumps.  
415 *Proc. Natl. Acad. Sci. USA* **111**, 6538–6539 (2014).
- 416 [17] Inoue, K. *et al.* A light-driven sodium ion pump in marine bacteria. *Nat.*  
417 *Commun.* **4**, 1678 (2013).
- 418 [18] Inoue, K., Konno, M., Abe-Yoshizumi, R., & Kandori, H. The role of  
419 the ndq motif in sodium-pumping rhodopsins. *Angew. Chem. Int. Ed.* **54**,  
420 11536–11539 (2015).
- 421 [19] Kato, H. E. *et al.* Atomistic design of microbial opsin-based blue-shifted  
422 optogenetics tools. *Nat. Commun.* **6**, 7177 (2015).
- 423 [20] Inoue, K., Nomura, Y., & Kandori, H. Asymmetric functional conversion of  
424 eubacterial light-driven ion pumps. *J. Biol. Chem* **291**, 9883–9893 (2016).
- 425 [21] Shimono, K., Iwamoto, M., Sumi, M., & Kamo, N. Effects of three charac-  
426 teristic amino acid residues of pharaonis phoborhodopsin on the absorption  
427 maximum. *Photochem. Photobiol.* **72**, 141–145 (2000).

- 428 [22] Sudo, Y. *et al.* A blue-shifted light-driven proton pump for neural silencing.  
429 *J. Biol. Chem* **288**, 20624–20632 (2013).
- 430 [23] Man, D. *et al.* Diversification and spectral tuning in marine proteo-  
431 orhodopsins. *EMBO J.* **22**, 1725–1731 (2003).
- 432 [24] Ozaki, Y., Kawashima, T., Abe-Yoshizumi, R., & Kandori, H. A color-  
433 determining amino acid residue of proteorhodopsin. *Biochemistry* **53**, 6032–  
434 6040 (2014).
- 435 [25] Fujimoto, K., Hayashi, S., Hasegawa, J. Y., & Nakatsuji, H. Theoretical  
436 studies on the color-tuning mechanism in retinal proteins. *J. Chem. Theory*  
437 *Comput.* **3**, 605–618 (2007).
- 438 [26] Abe-Yoshizumi, R., Inoue, K., Kato, H. E., Nureki, O., & Kandori, H. Role  
439 of asn112 in a light-driven sodium ion-pumping rhodopsin. *Biochemistry*  
440 **55**, 5790–5797 (2016).
- 441 [27] Sato, H. *et al.* Specific lipid-protein interactions in a novel honeycomb  
442 lattice structure of bacteriorhodopsin. *Acta Crystallogr. D Biol. Crystallogr*  
443 **55**, 1251–1256 (1999).
